# Supplementary material
Source: PubMed Central journal article supplement (PMC2938171)
Supplement: NIHMS228773-supplement-Supplementary_Data.pdf [file NIHMS228773-supplement-Supplementary_Data.pdf]

## Supplementary Information

**Table S1** List of the MD (setups 1-3) and SMD (setups 4-11) simulations performed in this study without (setups 1-2) or with (setups 3-10) harmonic-constraints.  $t_0$  indicates the time after equilibration at which the pulling of Gal started. The last two columns list the RMSD values ( $\text{\AA}$ )  $\pm$  standard deviations calculated for each setups.

**Table S2** (A) Coordination distances ( $\text{\AA}$ ) and (B) interaction energies (kcal/mol, non-bonded energies) of the  $\text{Na}^+$  ions in each monomer are listed as average values  $\pm$  standard deviations for setup 1. Interaction energies were calculated for the side-chains of residues Asp189, Glu192, Ser364 and 365 or the backbone of residues Ala62, Ala63, Ile65 and Ala361.

**Fig. S1** Coordination and mobility of sodium in and beyond the binding site. Distances ( $\text{\AA}$ ) (*top*) and interaction energies (*bottom*) between the  $\text{Na}^+$  ion and the indicated residues are shown for monomer B in setup 1.

**Fig. S2** Interaction energy of sodium with water and/or transporter as a function of time, calculated for each monomer in setup 1.

**Fig. S3** Selected distances ( $\text{\AA}$ ) of some of the possible interactions between the non-H atoms of the transporter and Gal are shown for monomer A in setup 1.

**Table S3** (A) Comparison of the average distances ( $\text{\AA}$ )  $\pm$  standard deviation for each pair of non-H atoms in Gal and the transporter for both monomers in setup 1 with those measured in the crystal structure. Interactions where a H-bond absent in the crystal was observed in at least one of the monomers or one where an H-bond distance was reported in the crystal but a H-bond was mostly absent in the simulation in setup 1 are underlined. Interactions within H-bond distance reported in the crystal structure are shown in **bold**. (B) Average energy (kcal/mol)  $\pm$  standard deviation of each Gal with the transporter groups calculated for setup 1.

**Fig. S4** Trajectory of the non-bonded interaction energy of Gal with water, the transporter or the  $\text{Na}^+$  ion calculated for each monomer in setup 1.

**Fig. S5** Force-displacement profiles where Gal(A) was pulled at an angle of  $60^\circ$  to the  $-z$  axis. Results are shown for two different pulling velocities, 2 and 4  $\text{\AA}/\text{ns}$ , corresponding to setups 9 and 10, respectively, and are plotted as force (pN) (*top*) or z coordinate ( $\text{\AA}$ ) (*bottom*) vs time (ns).

**Table S4** (A) Properties and dimensions of the system used in this study. (B) RMSD values ( $\text{\AA}$ )  $\pm$  standard deviation in the backbone coordinates compared with the energy-minimized structure.

**Table S1**     **Setups of simulations performed in this study**

| <u>Setup</u> | <u>time</u> | <u>Gal+Na<sup>+</sup></u> | <u>Constraints</u> | <u>pulled</u> | <u>velocity</u> | <u>t<sub>0</sub></u> | <u>pulling</u> | <u>RMSD</u>  |             |
|--------------|-------------|---------------------------|--------------------|---------------|-----------------|----------------------|----------------|--------------|-------------|
|              | (ns)        |                           |                    |               |                 |                      |                | <u>group</u> | (Å/ns)      |
| 1            | 30          | +                         | -                  | -             | -               | -                    | -              | 1.61 ± 0.13  | 1.92 ± 0.26 |
| 2            | 10          | -                         | -                  | -             | -               | -                    | -              | 1.61 ± 0.16  | 1.51 ± 0.15 |
| 3            | 10          | +                         | +                  | -             | -               | -                    | -              | 1.72 ± 0.20  | 1.69 ± 0.15 |
| 4            | 5           | +                         | +                  | Gal(A)        | 2               | 0.75                 | 0              | 1.24 ± 0.14  | 1.53 ± 0.30 |
| 5            | 2.5         | +                         | +                  | Gal(A)        | 4               | 0.75                 | 0              | 1.15 ± 0.18  | 1.17 ± 0.21 |
| 6            | 6           | +                         | +                  | Gal(A)        | 2               | 0                    | 0              | 1.60 ± 0.17  | 1.63 ± 0.20 |
| 7            | 5           | +                         | +                  | Gal(A)        | 4               | 0                    | 0              | 2.06 ± 0.21  | 1.87 ± 0.20 |
| 8            | 7           | +                         | +                  | Gal(B)        | 2               | 0                    | 0              | 1.51 ± 0.10  | 1.64 ± 0.21 |
| 9            | 5           | +                         | +                  | Gal(A)        | 2               | 0                    | 60             | 2.13 ± 0.26  | 1.87 ± 0.14 |
| 10           | 5           | +                         | +                  | Gal(A)        | 4               | 0                    | 60             | 1.51 ± 0.12  | 1.59 ± 0.15 |
| 11           | 5           | +                         | +                  | Gal(B)        | 4               | 0                    | 60             | 1.57 ± 0.16  | 1.52 ± 0.20 |

**Table S2.A**      **Coordination distances of the Na<sup>+</sup> ion (Å)**

|             | <u>simulation</u> |                  | <u>crystal</u>   |                  |
|-------------|-------------------|------------------|------------------|------------------|
|             | <u>monomer A</u>  | <u>monomer B</u> | <u>monomer A</u> | <u>monomer B</u> |
| Ala62(O)    | 3.95 ± 1.52       | 3.94 ± 1.95      | 3.64             | 3.72             |
| Ala63(O)    | 5.59 ± 1.48       | 5.20 ± 1.98      | 5.27             | 5.17             |
| Ile65(O)    | 5.28 ± 2.27       | 4.58 ± 2.56      | 3.32             | 3.19             |
| Asp189(Oδ1) | 4.38 ± 1.62       | 4.41 ± 1.36      | 4.43             | 4.63             |
| Asp189(Oδ2) | 4.95 ± 1.50       | 4.64 ± 1.77      | 6.14             | 6.32             |
| Gln192(Oε)  | 4.61 ± 1.55       | 6.36 ± 1.40      | 5.65             | 5.75             |
| Ala361(O)   | 5.19 ± 1.76       | 6.78 ± 1.63      | 3.23             | 3.11             |
| Ser364(Oγ)  | 3.94 ± 1.63       | 5.76 ± 1.45      | 3.13             | 3.11             |
| Ser365(Oγ)  | 5.60 ± 1.85       | 6.61 ± 1.97      | 3.68             | 3.50             |

**Table S2.B Energy of interaction with sodium (kcal/mol)**

|               | <u>monomer A</u> | <u>monomer B</u> |
|---------------|------------------|------------------|
| monomer       | -107.89 ± 23.71  | -110.29 ± 17.59  |
| water         | -66.35 ± 25.31   | -74.24 ± 22.64   |
| total         | -174.25 ± 16.45  | -184.53 ± 15.64  |
| Ala62(O)      | -26.53 ± 11.24   | -29.46 ± 13.47   |
| Ala63(O)      | -23.27 ± 6.19    | -24.84 ± 8.55    |
| Ile65(O)      | -25.75 ± 13.42   | -33.10 ± 17.14   |
| Asp189(Oδ1+2) | -74.49 ± 31.08   | -76.34 ± 35.85   |
| Gln192(Oε)    | -9.24 ± 8.35     | -3.05 ± 4.28     |
| Ala361(O)     | -22.54 ± 9.36    | -15.56 ± 7.04    |
| Ser364(Oγ)    | -10.82 ± 9.17    | -1.16 ± 5.51     |
| Ser365(Oγ)    | -4.25 ± 8.05     | -3.24 ± 5.49     |

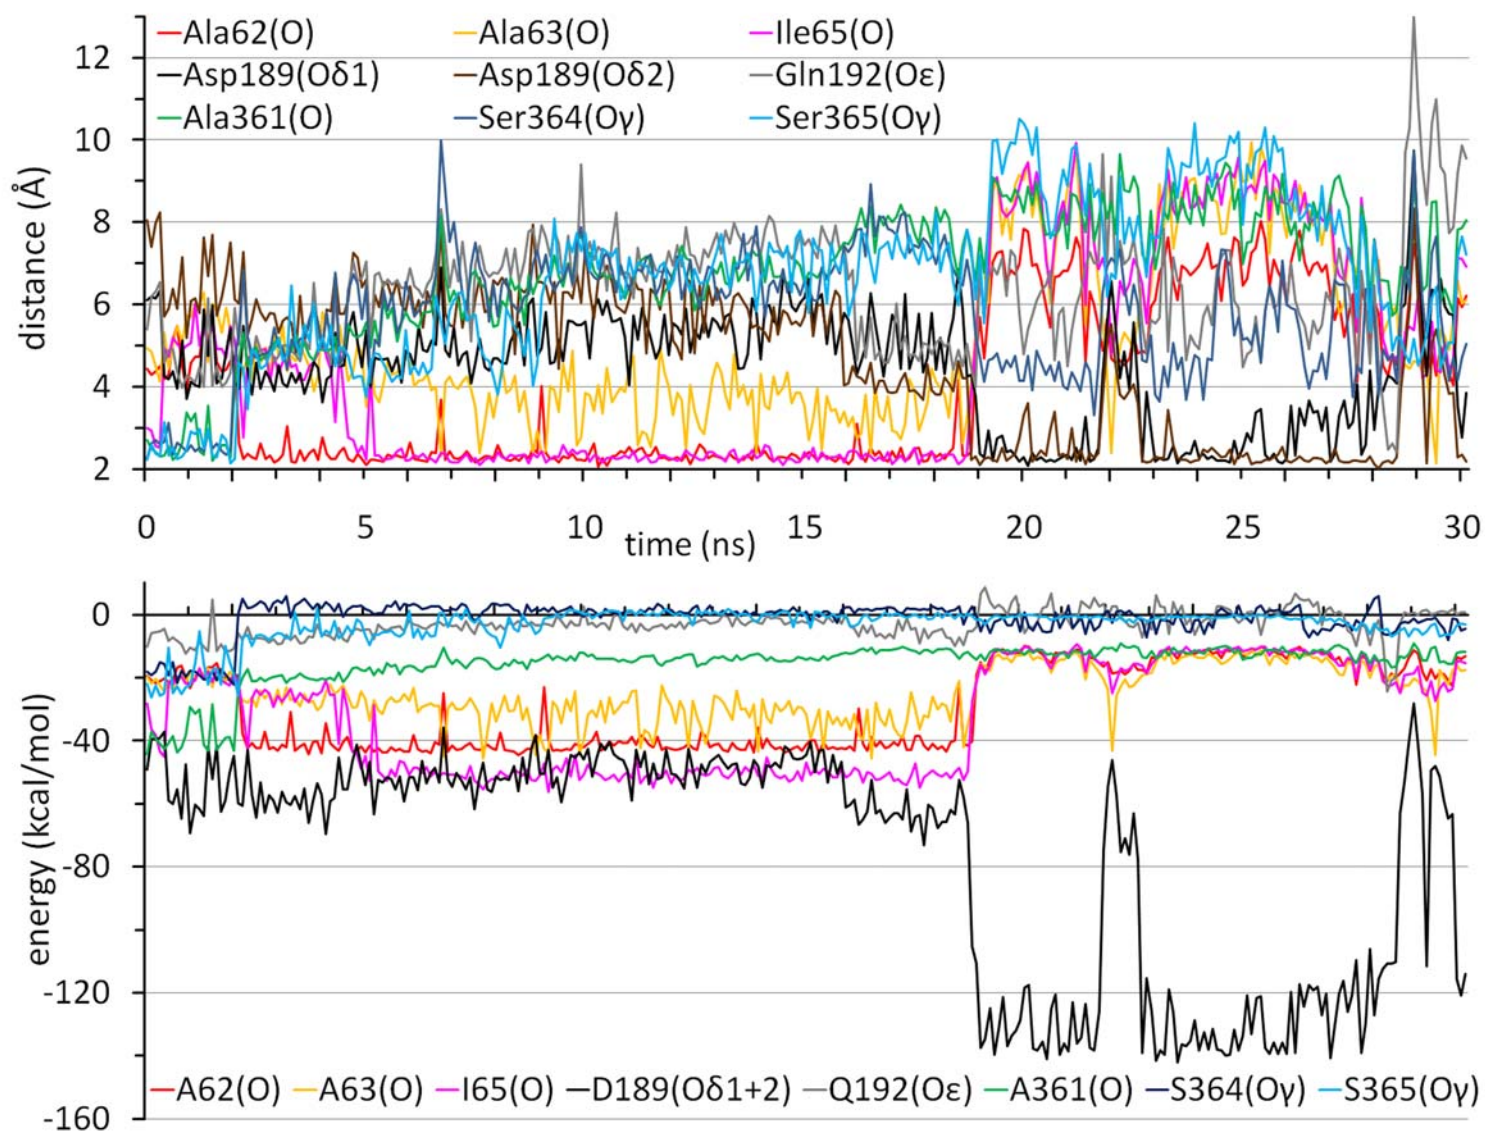

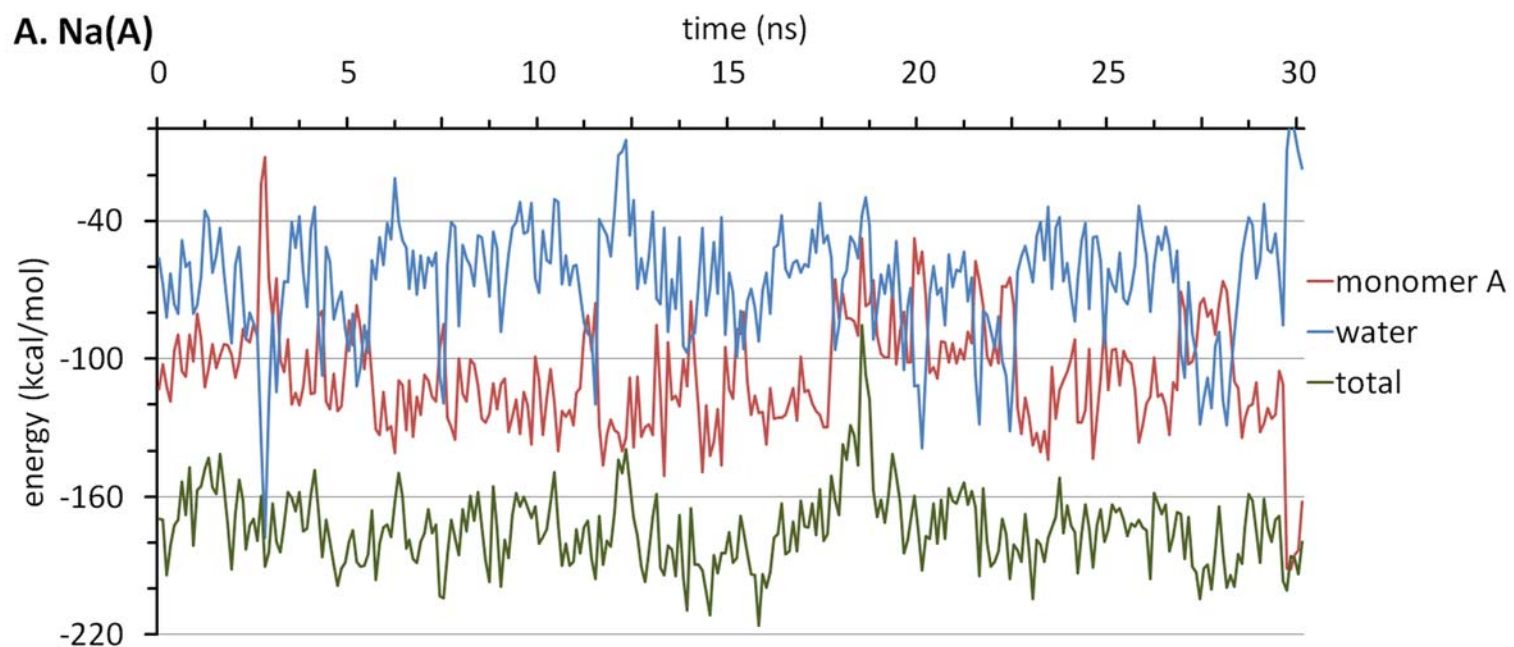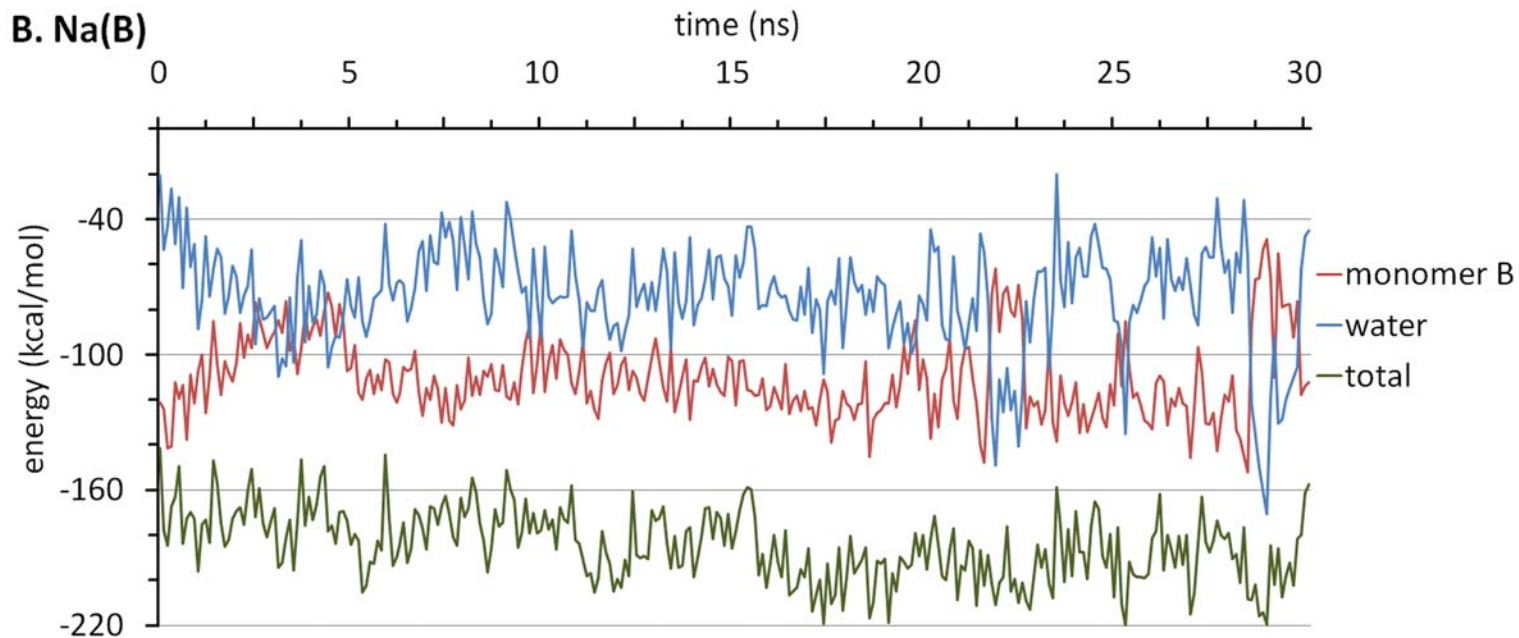

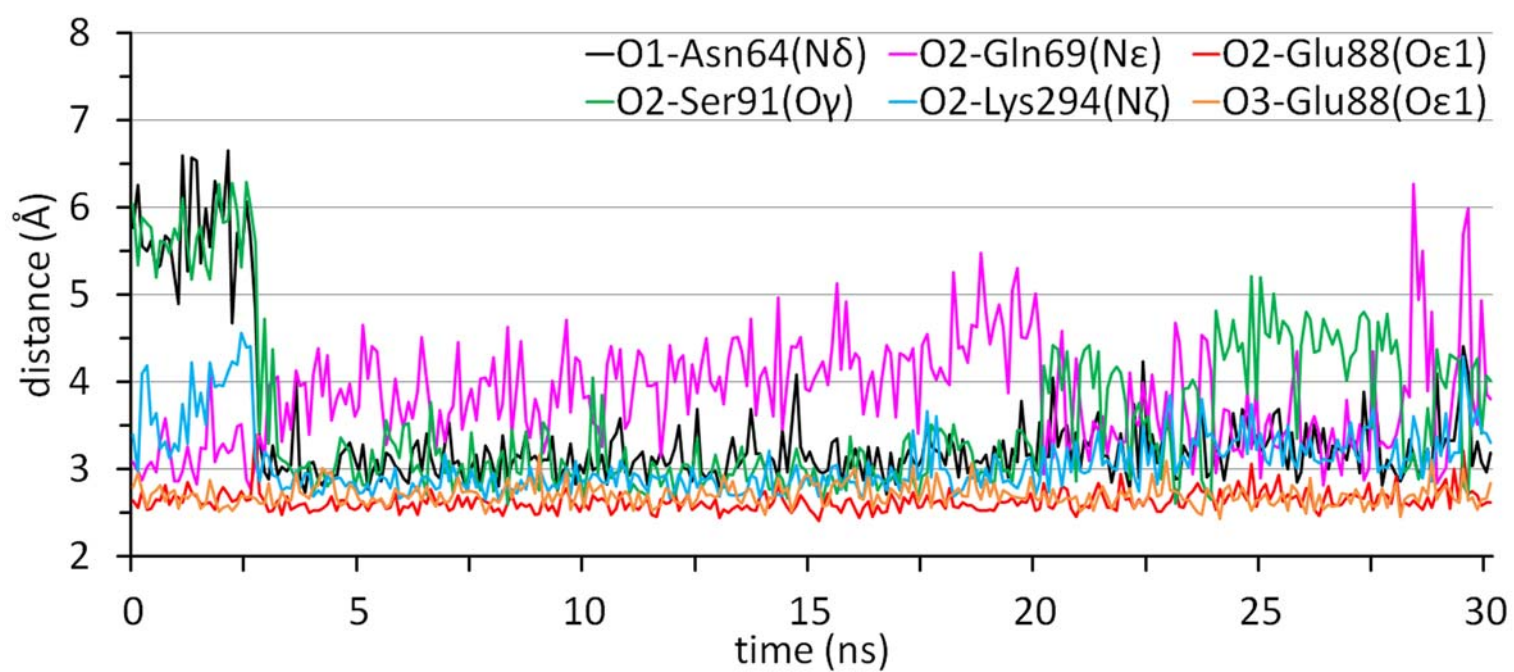

**Table S3.A** Coordination distances of galactose

|                                     | <u>simulation</u>         |                           | <u>crystal</u>     |                    |
|-------------------------------------|---------------------------|---------------------------|--------------------|--------------------|
|                                     | <u>monomer A</u>          | <u>monomer B</u>          | <u>monomer A</u>   | <u>monomer B</u>   |
| 1 <u>Gal(O1)-Asn64(Nδ)</u>          | <u>3.41 ± 0.80</u>        | <u>4.70 ± 1.24</u>        | <u>5.19</u>        | <u>5.19</u>        |
| 2 Gal(O1)-Glu68(Oε1)                | 8.04 ± 1.58               | 9.17 ± 2.16               | 4.47               | 4.51               |
| 3 <b><u>Gal(O1)-Asn69(Nε)</u></b>   | <b><u>4.80 ± 0.84</u></b> | <b><u>5.34 ± 1.04</u></b> | <b><u>3.20</u></b> | <b><u>3.27</u></b> |
| 4 Gal(O1)-Lys294(Nζ)                | 4.76 ± 1.11               | 6.44 ± 1.05               | 5.57               | 5.57               |
| 5 <b><u>Gal(O2)-Asn64(Nδ)</u></b>   | <b><u>4.33 ± 0.78</u></b> | <b><u>3.55 ± 0.73</u></b> | <b><u>3.22</u></b> | <b><u>3.24</u></b> |
| 6 Gal(O2)-Gln69(Nε)                 | 3.84 ± 0.59               | 4.65 ± 1.29               | 3.62               | 3.61               |
| 7 <b><u>Gal(O2)-Gln69(Oε)</u></b>   | <b><u>4.79 ± 0.71</u></b> | <b><u>5.10 ± 1.15</u></b> | <b><u>2.81</u></b> | <b><u>2.79</u></b> |
| 8 Gal(O2)-Glu88(Oε1)                | 3.80 ± 0.37               | 4.25 ± 1.55               | 3.69               | 3.66               |
| 9 <b><u>Gal(O2)-Glu88(Oε2)</u></b>  | <b><u>2.63 ± 0.11</u></b> | <b><u>4.52 ± 0.58</u></b> | <b><u>2.98</u></b> | <b><u>2.94</u></b> |
| 10 <u>Gal(O2)-Ser91(Oγ)</u>         | <u>3.61 ± 0.91</u>        | <u>4.74 ± 1.33</u>        | <u>5.44</u>        | <u>5.43</u>        |
| 11 <b><u>Gal(O2)-Lys294(Nζ)</u></b> | <b><u>3.07 ± 0.36</u></b> | <b><u>4.14 ± 0.92</u></b> | <b><u>2.76</u></b> | <b><u>2.75</u></b> |
| 12 <b><u>Gal(O3)-Glu88(Oε2)</u></b> | <b><u>2.70 ± 0.12</u></b> | <b><u>3.57 ± 0.94</u></b> | <b><u>3.09</u></b> | <b><u>3.09</u></b> |
| 13 <b><u>Gal(O3)-Ser91(Oγ)</u></b>  | <b><u>4.97 ± 0.71</u></b> | <b><u>4.29 ± 0.91</u></b> | <b><u>2.56</u></b> | <b><u>2.57</u></b> |
| 14 Gal(O3)-Trp264(Nε)               | 7.25 ± 0.67               | 6.25 ± 1.29               | 3.49               | 3.47               |
| 15 <b><u>Gal(O3)-Lys294(Nζ)</u></b> | <b><u>4.95 ± 0.59</u></b> | <b><u>4.01 ± 1.26</u></b> | <b><u>2.85</u></b> | <b><u>2.83</u></b> |
| 16 <u>Gal(O4)-Glu88(Oε2)</u>        | <u>5.07 ± 0.22</u>        | <u>4.63 ± 1.90</u>        | <u>4.58</u>        | <u>4.48</u>        |
| 17 <b><u>Gal(O4)-Asn260(Nδ)</u></b> | <b><u>5.17 ± 0.62</u></b> | <b><u>5.88 ± 0.79</u></b> | <b><u>2.73</u></b> | <b><u>2.80</u></b> |
| 18 Gal(O4)-Asn260(Oδ)               | 6.23 ± 1.11               | 4.92 ± 0.61               | 4.59               | 4.66               |
| 19 Gal(O4)-Gln428(Nε)               | 4.85 ± 1.40               | 4.87 ± 0.85               | 5.31               | 5.17               |
| 20 <b><u>Gal(O5)-Glu428(Nε)</u></b> | <b><u>6.29 ± 1.72</u></b> | <b><u>4.96 ± 1.70</u></b> | <b><u>3.04</u></b> | <b><u>2.97</u></b> |
| 21 Gal(O6)-Ala259(O)                | 4.31 ± 0.90               | 4.83 ± 0.77               | 3.93               | 3.98               |
| 22 Gal(O6)-Gln428(Nε)               | 5.01 ± 1.63               | 4.41 ± 1.02               | 3.33               | 3.23               |
| 23 <b><u>Gal(O6)-Gln428(Oε)</u></b> | <b><u>4.64 ± 1.68</u></b> | <b><u>4.64 ± 1.72</u></b> | <b><u>2.69</u></b> | <b><u>2.68</u></b> |



| <b>Table S3.B Galactose interaction energies (kcal/mol)</b> |                | <u>monomer A</u> | <u>monomer B</u> |
|-------------------------------------------------------------|----------------|------------------|------------------|
| 1                                                           | full monomer   | -63.07 ± 10.21   | -60.75 ± 9.53    |
| 2                                                           | H2             | -4.07 ± 5.29     | -4.44 ± 3.14     |
| 3                                                           | H3             | -32.70 ± 4.26    | -31.41 ± 6.52    |
| 4                                                           | H7             | -11.66 ± 2.49    | -11.29 ± 2.45    |
| 5                                                           | H8             | -7.44 ± 9.82     | -4.90 ± 8.17     |
| 6                                                           | H11            | -5.81 ± 3.59     | -7.35 ± 4.14     |
| 7                                                           | Asn64 (H2)     | -3.59 ± 1.96     | -3.89 ± 1.82     |
| 8                                                           | Glu68 (H2)     | 2.17 ± 3.23      | 1.90 ± 1.42      |
| 9                                                           | Gln69 (H2)     | -1.27 ± 3.26     | -2.08 ± 2.31     |
| 10                                                          | Glu88 (H3)     | -28.29 ± 3.87    | -27.19 ± 6.36    |
| 11                                                          | Ser91 (H3)     | -1.88 ± 3.06     | -1.25 ± 3.05     |
| 12                                                          | Ala259(O) (H7) | -0.94 ± 1.31     | -1.06 ± 0.98     |
| 13                                                          | Asn260 (H7)    | -4.69 ± 1.53     | -5.00 ± 1.81     |
| 14                                                          | Trp264 (H7)    | -1.70 ± 1.43     | -0.86 ± 0.78     |
| 15                                                          | Lys294 (H8)    | -7.50 ± 9.84     | -5.84 ± 9.00     |
| 16                                                          | Gln428 (H11)   | -3.67 ± 3.29     | -4.91 ± 3.96     |
| 17                                                          | water          | -18.06 ± 6.31    | -19.73 ± 7.72    |
| 18                                                          | sodium         | -1.32 ± 0.72     | -1.34 ± 0.70     |

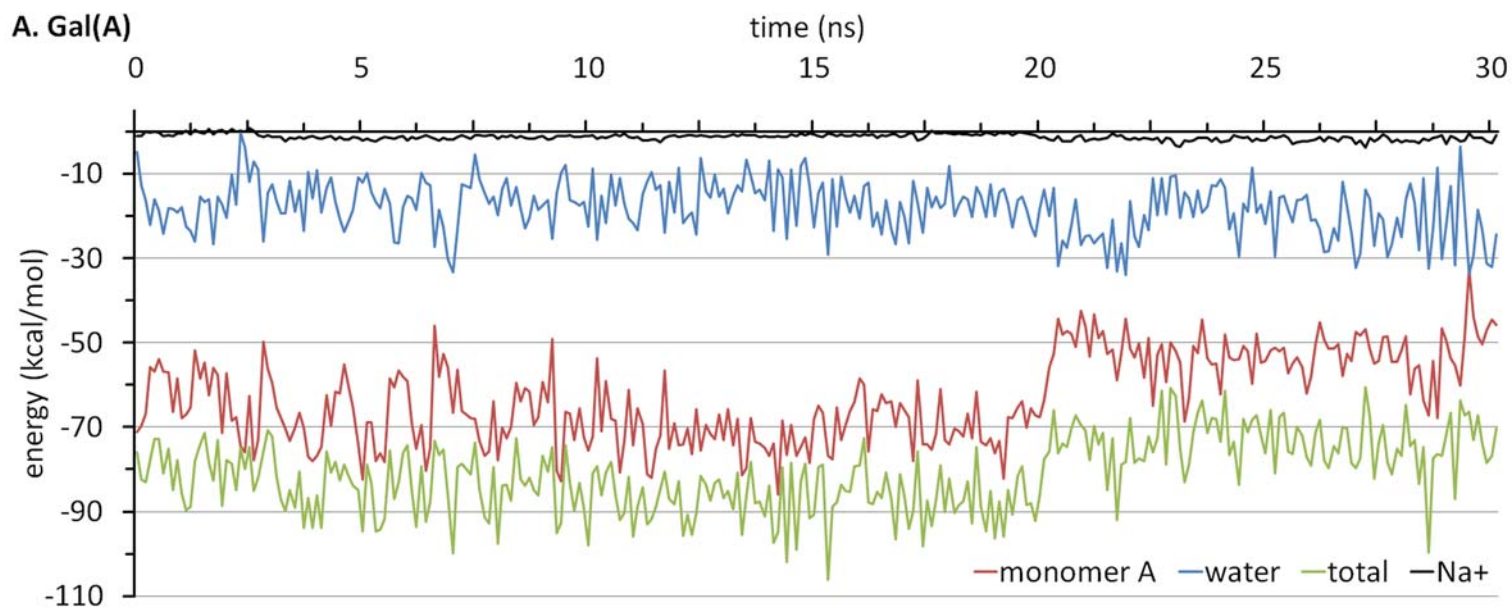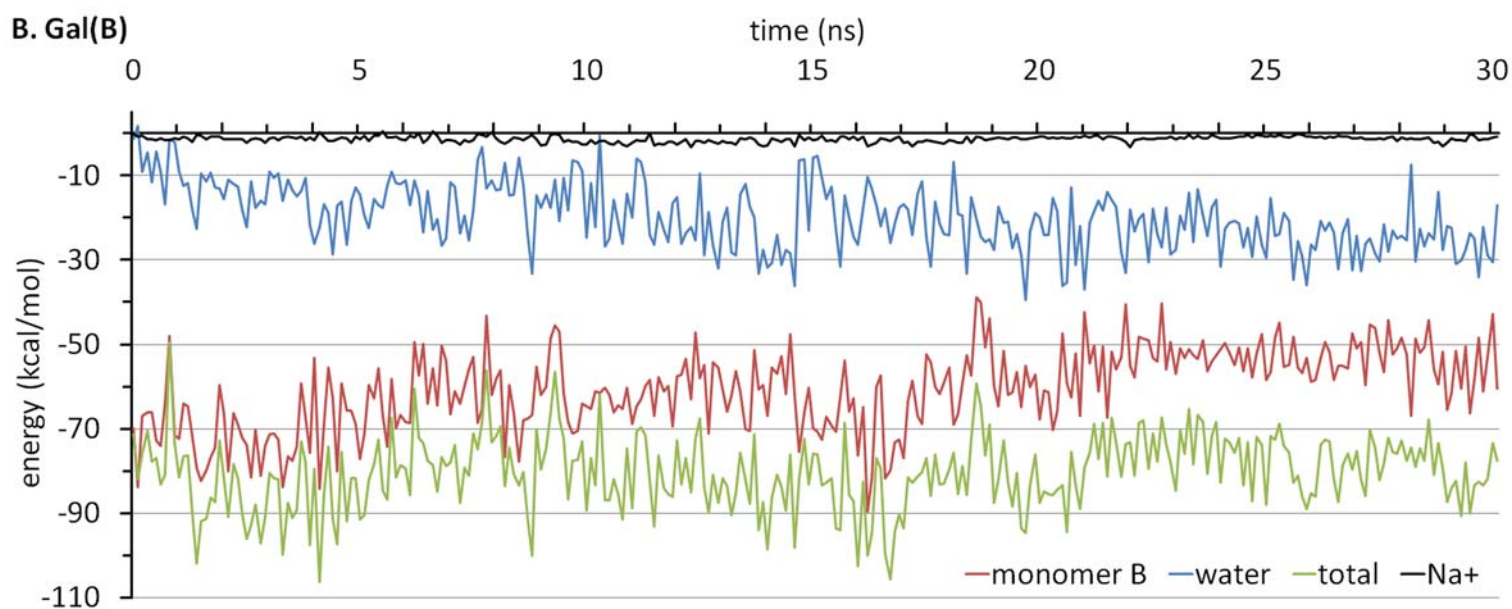

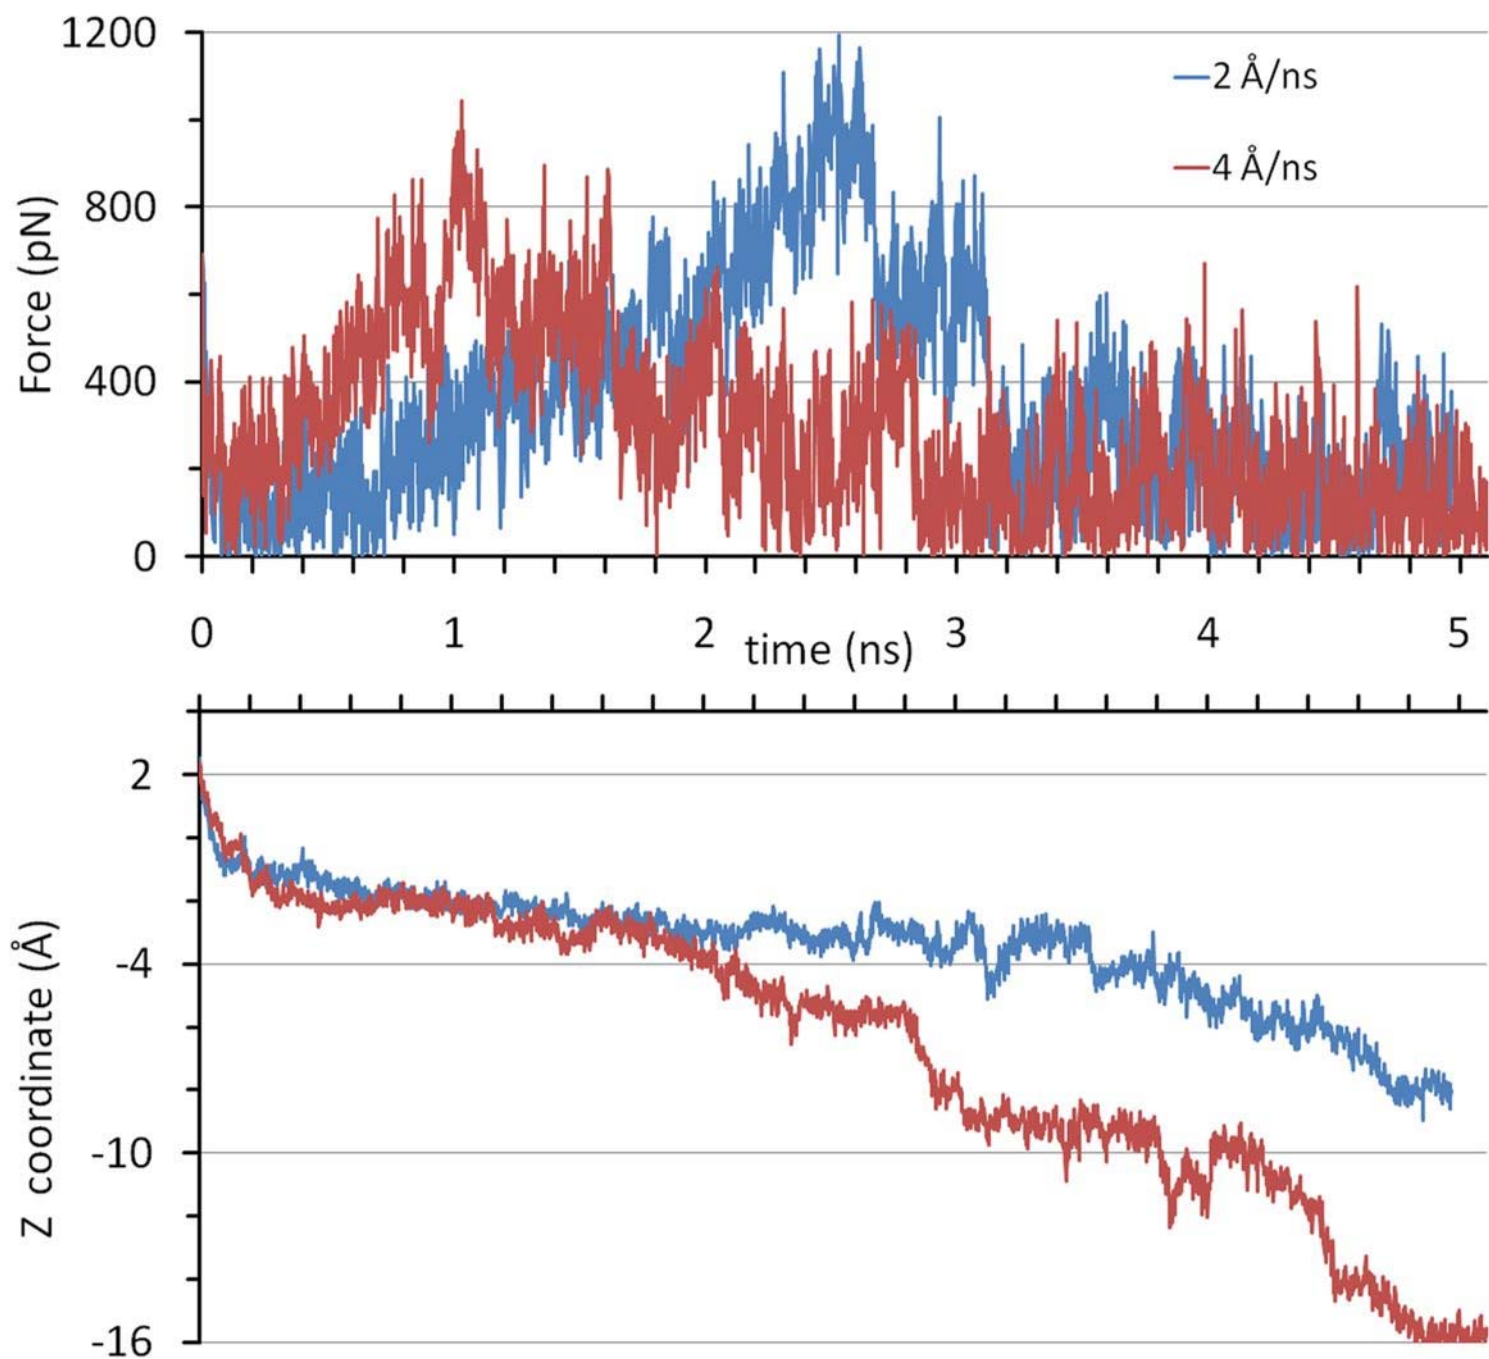

---

**Table S4**      **System properties and dimensions**

---

|                       |                             |
|-----------------------|-----------------------------|
| total number of atoms | 113'510                     |
| residues in dimer     | 1086                        |
| lipid molecules       | 321                         |
| water molecules       | 19'269                      |
| water layers (Å)      | 13 intra-, 25 extracellular |
| x (all) (Å)           | 140                         |
| y (all) (Å)           | 118                         |
| z (all) (Å)           | 92                          |
| x (protein) (Å)       | ~ 100                       |
| y (protein) (Å)       | ~ 60                        |
| z (protein) (Å)       | ~ 74                        |
| x (lipid padding) (Å) | at least 15                 |
| y (lipid padding) (Å) | at least 15                 |
| z (water padding) (Å) | 9 intra-, 9 extracellular   |

---
